# Supplementary material
Source: PubMed Central journal article supplement (PMC5848310)
Supplement: cix753_suppl_supplementary_material.pdf [file cix753_suppl_supplementary_material.pdf]

Havens, PL et al. Vitamin D3 Supplementation Increases Spine Bone Mineral Density in Adolescents and Young Adults with HIV Infection Being Treated with Tenofovir Disoproxil Fumarate: A Randomized, Placebo-Controlled Trial

Supplementary material

## **Laboratory methods**

Serum intact PTH was measured using an electrochemiluminescence immunoassay (Intact-PTH, Cobas e411; Roche Diagnostics Corp., Indianapolis, IN). Serum fibroblast growth factor 23 (FGF23) was measured by ELISA (Kainos Laboratories, Inc., Tokyo, Japan). Serum VDBP was measured by ELISA (Quantikine VDBP ELISA kit; R&D Systems, Inc., Minneapolis, MN).

Serum C-terminal telopeptides (CTX) were measured by ELISA (Serum CrossLaps ELISA, Immunodiagnostic Systems (IDS) Inc., Gaithersburg, MD). Serum intact osteocalcin and bone-specific alkaline phosphatase were determined by enzyme immunoassay (EIA) (MicroVue; Quidel Corporation, San Diego, CA).

Calcium, phosphate, creatinine, and albumin from serum, and glucose from plasma (collected with a vacutainer containing potassium oxalate and sodium fluoride) were determined using a clinical chemistry analyzer (Cobas Integra 400 Plus; Roche Diagnostics Corp., Indianapolis, IN).

Serum 25-OHD was measured by EIA and 1,25-OH(2)D was measured by radioimmunoassay (Immunodiagnostic Systems (IDS) Inc., Gaithersburg, MD).

Urinary retinol binding protein (URBP) was measured by ELISA (DetectX urinary RBP EIA kit; Arbor Assays, Ann Arbor, MI). URBP values were normalized for urine creatinine concentrations. Urinary beta-2 microglobulin was determined using a solid phase electrochemiluminescence assay (Meso Scale Discovery, LLC, Rockville, MD).

The concentrations of calcium, phosphate, protein, glucose, and creatinine in urine were determined using a clinical chemistry analyzer (Cobas Integra 400 Plus; Roche Diagnostics Corp., Indianapolis, IN).

**Supplemental Table 1. Calcium and Vitamin D Intake During 48 Weeks of the Study**

| Characteristic                                                   | Overall <sup>1</sup> | Randomized Group |            | P value <sup>6</sup> |
|------------------------------------------------------------------|----------------------|------------------|------------|----------------------|
|                                                                  |                      | Vitamin D3       | Placebo    |                      |
| Multivitamin adherence by pill count                             |                      |                  |            |                      |
| N with data                                                      | 146                  | 75               | 71         |                      |
| Adherence (%) <sup>2</sup>                                       |                      |                  |            |                      |
| Median                                                           | 49%                  | 49%              | 49%        | 0.68                 |
| Q1, Q3                                                           | 27%, 69%             | 27%, 68%         | 27%, 70%   |                      |
| Study drug adherence                                             |                      |                  |            |                      |
| N with data                                                      | 188                  | 99               | 89         |                      |
| Administered within visit window (%) <sup>3</sup>                |                      |                  |            |                      |
| Median                                                           | 100%                 | 100              | 100        | 0.21                 |
| Q1, Q3                                                           | 83%, 100%            | 83%, 100%        | 92%, 100%  |                      |
| Total doses administered (%)                                     |                      |                  |            |                      |
| Median                                                           | 100%                 | 100%             | 100%       | 0.49                 |
| Q1, Q3                                                           | 100%, 100%           | 92%, 100%        | 100%, 100% |                      |
| Calcium intake (mg/day)                                          |                      |                  |            |                      |
| Dietary <sup>4</sup>                                             |                      |                  |            |                      |
| Median                                                           | 845                  | 862              | 828        | 0.45                 |
| Q1, Q3                                                           | 526, 1290            | 584, 1280        | 472, 1295  |                      |
| Multivitamin <sup>5</sup>                                        |                      |                  |            |                      |
| Median                                                           | 79                   | 80               | 79         | 0.68                 |
| Q1, Q3                                                           | 44, 112              | 44, 110          | 43, 113    |                      |
| Total calcium intake                                             |                      |                  |            |                      |
| Median                                                           | 888                  | 906              | 853        | 0.47                 |
| Q1, Q3                                                           | 609, 1321            | 637, 1317        | 559, 1349  |                      |
| Inadequate <sup>7</sup> total daily calcium intake for age N (%) | 108 (58%)            | 55 (56%)         | 53 (60%)   | 0.66                 |
| Vitamin D intake (IU/day)                                        |                      |                  |            |                      |
| Dietary <sup>4</sup>                                             |                      |                  |            |                      |
| Median                                                           | 124                  | 124              | 123        | 0.55                 |
| Q1, Q3                                                           | 68, 199              | 73, 206          | 67, 191    |                      |
| Multivitamin <sup>5</sup>                                        |                      |                  |            |                      |
| Median                                                           | 195                  | 196              | 195        | 0.68                 |
| Q1, Q3                                                           | 108, 277             | 110, 271         | 107, 279   |                      |
| Study drug                                                       |                      |                  |            |                      |
| Median                                                           |                      | 1780             | 0          | ---                  |
| Q1, Q3                                                           |                      | 1637, 1786       | 0, 0       |                      |
| Total vitamin D intake                                           |                      |                  |            |                      |
| Median                                                           |                      | 2020             | 284        | <0.001               |
| Q1, Q3                                                           |                      | 1914, 2168       | 179, 394   |                      |

1. Evaluable participants only. The data represent cumulative experience over the duration of the study.
2. Median (Q1, Q3) unless otherwise specified. Calculated as total number of pills taken divided by the number of days on study.
3. Visit window was one week before or after the every 28-day target visit for directly observed therapy. A minimum of 21 days was required between DOT visits for study drug administration. Denominator was the total number of DOT visits (=12).
4. Calculated from the food frequency questionnaire at week 48
5. For the multivitamin and for study drug, intake = Received dose = prescribed dose multiplied by adherence (ref 17). Inadvertently, the initially distributed preparation contained calcium 45 mg, taken by 48 participants for a median of 2.8 (range 0.9 to 2.5) months, at which time the error was identified and the originally planned preparation, with calcium 162 mg, was distributed to study sites. The calculated received dose for these individuals accounts for this error.
6. P-value by Wilcoxon Rank Sum test for continuous variables and Fisher's Exact test for categorical variables.
7. Total calcium intake was defined as inadequate if a subject was  $\leq 18$  years old and had total calcium intake  $< 1300$  mg or if  $\geq 19$  years old and had total calcium intake  $< 1000$  mg. All other subjects not meeting criteria for being inadequate were classified as adequate.

**Supplemental Table 2. Endocrine, Renal, and Bone Mineral Density Measurements at Baseline, Weeks 12, 24, and 48, and Change from Baseline to Weeks 12, 24, and 48 by Randomized Study Group**

| Variable <sup>1</sup>                                    | Rando<br>mized<br>Group | N <sup>2</sup> |                   | Study Week – Median (Q1, Q3) |                                                      |                                                      |                                                      | P<br>value <sup>3</sup> |
|----------------------------------------------------------|-------------------------|----------------|-------------------|------------------------------|------------------------------------------------------|------------------------------------------------------|------------------------------------------------------|-------------------------|
|                                                          |                         |                |                   | Baseline                     | 12                                                   | 24                                                   | 48                                                   |                         |
| <b>Vitamin D-related Variables</b>                       |                         |                |                   |                              |                                                      |                                                      |                                                      |                         |
| Serum 25-OHD<br>(ng/mL)                                  | VITD                    | 100            | value<br>change   | 15.7 (12.1, 24.9)            | 35.1 (29.8, 39.8)<br>16.3 (9.3, 21.2) <sup>†</sup>   | 37.0 (30.4, 44.1)<br>18.6 (10.5, 25.6) <sup>†</sup>  | 36.9 (30.5, 42.4)<br>17.8 (11.8, 24.0) <sup>†</sup>  | <0.001                  |
|                                                          | PL                      | 91             | value<br>change   | 16.8 (10.2, 22.7)            | 24.0 (18.4, 30.2)<br>6.9 (2.3, 11.6) <sup>†</sup>    | 23.3 (17.9, 28.5)<br>6.8 (1.4, 22.2) <sup>†</sup>    | 20.6 (14.4, 25.8)<br>2.6 (-1.7, 7.5) <sup>†</sup>    |                         |
| Serum 1,25-<br>OH(2)D<br>(pmol/L)                        | VITD                    | 99             | value<br>change   | 72.5 (58.3, 89.5)            | 87.7 (70.5, 112.1)<br>15.6 (-0.3, 35.2) <sup>†</sup> | 90.7 (72.2, 112.9)<br>12.9 (-7.6, 36.6) <sup>†</sup> | 83.6 (70.1, 112.5)<br>10.5 (-2.1, 31.5) <sup>†</sup> | 0.014                   |
|                                                          | PL                      | 91             | value<br>change   | 68.9 (57.1, 96.1)            | 81.5 (60.2, 106.1)<br>6.1 (-7.6, 25.5)*              | 80.4 (66.7, 106.0)<br>8.6 (-9.0, 27.0) <sup>^</sup>  | 78.3 (61.4, 95.7)<br>2.7 (-14.7, 24.5)               |                         |
| Serum free 1,25-<br>OH(2)D<br>(fmol/L)                   | VITD                    | 99             | value<br>change   | 418 (315, 638)               | 561 (361, 792)<br>107 (-13, 222) <sup>†</sup>        | 582 (383, 768)<br>99 (-30, 243) <sup>†</sup>         | 572 (364, 757)<br>64 (-19, 203) <sup>†</sup>         | 0.021                   |
|                                                          | PL                      | 91             | value<br>change   | 445 (312, 638)               | 496 (355, 697)<br>53 (-29, 149) <sup>†</sup>         | 496 (354, 689)<br>59 (-42, 162) <sup>†</sup>         | 452 (333, 646)<br>26 (-101, 118)                     |                         |
| Serum vitamin D<br>binding protein<br>(mcg/mL)           | VITD                    | 100            | value<br>change   | 153 (1058, 251)              | 161 (109, 259)<br>-2 (-11, 9)                        | 156 (104, 259)<br>-1 (-17, 7)                        | 151 (99, 259)<br>-4 (-16, 5)*                        | 0.11                    |
|                                                          | PL                      | 91             | value<br>change   | 159 (104, 230)               | 147 (103, 233)<br>-1 (-10, 9)                        | 151 (104, 231)<br>-2 (-8, 8)                         | 144 (105, 228)<br>1 (-12, 13)                        |                         |
| <b>Bone Mineral Density and Anthropometric Variables</b> |                         |                |                   |                              |                                                      |                                                      |                                                      |                         |
| Lumbar spine<br>(L1-L4) BMD<br>(g/cm <sup>2</sup> )      | VITD                    | 99             | value<br>% change | 1.06 (0.99, 1.19)            | NA                                                   | 1.09 (1.00, 1.19)<br>0.94 (-0.72, 2.16) <sup>†</sup> | 1.08 (1.01, 1.16)<br>1.15 (-0.75, 2.74) <sup>†</sup> | 0.12                    |
|                                                          | PL                      | 89             | value<br>% change | 1.08 (0.98, 1.20)            | NA                                                   | 1.09 (0.97, 1.21)<br>0.42 (-1.02, 1.91)*             | 1.08 (0.97, 1.18)<br>0.09 (-1.49, 2.61)              |                         |
| Lumbar spine<br>(L1-L4) BMD Z-<br>score                  | VITD                    | 99             | value<br>change   | -0.65 (-1.40, 0.00)          | NA                                                   | -0.50 (-1.30, 0.10)<br>0.00 (-0.10, 0.20)            | -0.70 (-1.40, 0.00)<br>0.00 (-0.10, 0.10)            | 0.14                    |
|                                                          | PL                      | 89             | value<br>change   | -0.70 (-1.60, 0.20)          | NA                                                   | -0.70 (-1.60, 0.10)<br>0.00 (-0.10, 0.10)            | -0.90 (-1.70, -0.10)<br>-0.10 (-0.30, 0.20)*         |                         |

|                                              |      |     |                   |                     |                                                   |                                                    |                                                    |      |
|----------------------------------------------|------|-----|-------------------|---------------------|---------------------------------------------------|----------------------------------------------------|----------------------------------------------------|------|
| Total hip BMD (gm/cm <sup>2</sup> )          | VITD | 99  | value<br>% change | 1.06 (0.95, 1.16)   | NA                                                | 1.06 (0.95, 1.15)<br>-0.27 (-1.08, 1.53)           | 1.07 (0.94, 1.15)<br>-0.17 (-2.12, 1.73)           | 0.40 |
|                                              | PL   | 89  | value<br>% change | 1.05 (0.95, 1.17)   | NA                                                | 1.04 (0.96, 1.17)<br>0.00 (-1.14, 1.46)            | 1.03 (0.94, 1.14)<br>-0.42 (-1.66, 0.71)           |      |
| Total hip BMD Z-score                        | VITD | 97  | value<br>change   | -0.40 (-1.10, 0.10) | NA                                                | -0.40 (-1.00, 0.10)<br>0.00 (-0.10, 0.10)          | -0.40 (-0.90, 0.10)<br>0.00 (-0.10, 0.10)          | 0.12 |
|                                              | PL   | 89  | value<br>change   | -0.65 (-1.30, 0.00) | NA                                                | -0.70 (-1.35, 0.00)<br>0.00 (-0.10, 0.10)          | -0.80 (-1.40, -0.10)<br>0.00 (-0.10, 0.10)         |      |
| Total body BMD (g/cm <sup>2</sup> )          | VITD | 99  | value<br>% change | 1.18 (1.10, 1.25)   | NA                                                | 1.18 (1.11, 1.25)<br>-0.07 (-1.20, 1.01)           | 1.18 (1.11, 1.24)<br>0.00 (-1.78, 1.36)            | 0.91 |
|                                              | PL   | 89  | value<br>% change | 1.17 (1.07, 1.26)   | NA                                                | 1.17 (1.8, 1.25)<br>0.18 (-1.15, 1.30)             | 1.16 (1.09, 1.25)<br>-0.27 (-1.39, 1.18)           |      |
| Total body BMD Z-score                       | VITD | 99  | value<br>change   | -0.60 (-1.35, 0.10) | NA                                                | -0.70 (-1.30, 0.10)<br>0.00 (-0.10, 0.10)          | -0.60 (-1.20, 0.00)<br>0.00 (-0.30, 0.10)          | 0.56 |
|                                              | PL   | 89  | value<br>change   | -0.80 (-1.65, 0.10) | NA                                                | -0.70 (-1.60, 0.20)<br>0.00 (-0.10, 0.10)          | -0.70 (-1.80, 0.10)<br>0.00 (-0.20, 0.10)          |      |
| Total body bone mineral content (g)          | VITD | 99  | value<br>% change | 2636 (2368, 2939)   | NA                                                | 2670 (2395, 2949)<br>0.25 (-1.23, 1.44)            | 2694 (2380, 2941)<br>0.08 (-1.47, 1.61)            | 0.84 |
|                                              | PL   | 89  | value<br>% change | 2596 (2316, 2936)   | NA                                                | 2612 (2284, 2913)<br>0.07 (-0.82, 1.09)            | 2633 (2304, 2943)<br>0.07 (-1.42, 0.98)            |      |
| Body weight (kg)                             | VITD | 100 | value<br>change   | 75.7 (64.9, 87.2)   | NA                                                | 75.3 (66.7, 87.5)<br>0.0 (-1.8, 2.0)               | 77.5 (66.6, 88.7)<br>0.6 (-2.0, 3.4)               | 0.80 |
|                                              | PL   | 91  | value<br>change   | 70.8 (62.6, 85.6)   | NA                                                | 71.9 (62.3, 89.1)<br>0.1 (-1.6, 1.6)               | 71.2 (62.6, 90.2)<br>0.6 (-0.9, 2.7) <sup>^</sup>  |      |
| Height (cm)                                  | VITD | 100 | value<br>change   | 173 (168, 178)      | NA                                                | 173 (168, 179)<br>0.0 (-0.2, 0.0)                  | 173 (169, 179)<br>0.0 (0.0, 0.3)                   | 0.77 |
|                                              | PL   | 91  | value<br>change   | 175 (168, 180)      | NA                                                | 174 (168, 180)<br>0.0 (-0.2, 0.0)                  | 174 (168, 180)<br>0.0 (0.0, 0.2)                   |      |
| <b>Endocrine and Bone Turnover Variables</b> |      |     |                   |                     |                                                   |                                                    |                                                    |      |
| Serum parathyroid hormone (pg/mL)            | VITD | 98  | value<br>change   | 38.7 (28.8, 48.5)   | 35.8 (26.5, 47.3)<br>-2.2 (-10.3, 4.0)*           | 36.1 (26.5, 44.0)<br>-0.3 (-10.4, 6.7)             | 33.7 (26.8, 42.0)<br>-2.2 (-10.1, 4.3)*            | 0.47 |
|                                              | PL   | 89  | value<br>change   | 37.0 (28.7, 46.6)   | 34.2 (28.5, 42.8)<br>-0.8 (-7.8, 4.0)             | 34.9 (26.1, 45.4)<br>-1.7 (-7.8, 5.7)              | 35.8 (28.6, 43.5)<br>-1.0 (-9.3, 4.9)              |      |
| Serum fibroblast growth factor 23 (pg/mL)    | VITD | 100 | value<br>change   | 33.2 (26.7, 42.7)   | 37.6 (28.5, 44.7)<br>3.3 (-3.0, 9.2) <sup>†</sup> | 36.3 (30.2, 44.3)<br>2.9 (-4.1, 8.4)*              | 37.7 (30.6, 43.9)<br>4.8 (-2.8, 10.3) <sup>^</sup> | 0.71 |
|                                              | PL   | 91  | value<br>change   | 34.5 (27.0, 42.1)   | 37.4 (31.3, 43.2)<br>3.9 (-2.3, 9.2) <sup>†</sup> | 38.2 (32.2, 45.0)<br>3.7 (-4.5, 10.5) <sup>^</sup> | 38.3 (30.5, 46.5)<br>3.2 (-3.8, 10.2) <sup>^</sup> |      |

|                                                           |      |     |              |                    |                                                      |                                                      |                                                        |      |
|-----------------------------------------------------------|------|-----|--------------|--------------------|------------------------------------------------------|------------------------------------------------------|--------------------------------------------------------|------|
| Serum bone specific alkaline phosphatase (U/L)            | VITD | 100 | value change | 31.5 (25.6, 36.7)  | 30.0 (24.3, 36.4)<br>-1.1 (-4.3, 1.9) <sup>^</sup>   | 27.9 (23.7, 34.8)<br>-2.5 (-5.3, 0.1) <sup>†</sup>   | 27.9 (22.8, 33.9)<br>-2.7 (-6.4, -0.5) <sup>†</sup>    | 0.20 |
|                                                           | PL   | 91  | value change | 31.8 (25.4, 37.9)  | 29.3 (24.2, 34.3)<br>-1.7 (-3.8, 0.8) <sup>†</sup>   | 28.5 (24.0, 36.5)<br>-2.0 (-4.5, 0.4) <sup>†</sup>   | 27.9 (22.5, 34.2)<br>-2.2 (-5.6, 1.1) <sup>†</sup>     |      |
| Serum osteocalcin (mcg/L)                                 | VITD | 100 | value change | 9.60 (6.47, 11.63) | 9.38 (7.19, 11.73)<br>0.15 (-0.78, 1.67)             | 9.17 (7.22, 11.78)<br>0.09 (-1.06, 1.46)             | 8.79 (6.56, 11.15)<br>-0.93 (-2.10, 0.62) <sup>†</sup> | 0.78 |
|                                                           | PL   | 90  | value change | 8.94 (5.97, 11.82) | 9.01 (6.34, 12.66)<br>-0.10 (-1.15, 1.66)            | 8.92 (5.70, 10.97)<br>-0.22 (-1.43, 1.12)            | 8.71 (6.20, 11.02)<br>-0.48 (-1.95, 0.41) <sup>†</sup> |      |
| Serum C terminal telopeptides (mcg/L)                     | VITD | 99  | value change | 0.76 (0.56, 1.10)  | 0.72 (0.59, 0.99)<br>-0.03 (-0.21, 0.13)             | 0.73 (0.54, 1.00)<br>-0.03 (-0.24, 0.18)             | 0.68 (0.51, 0.90)<br>-0.08 (-0.25, 0.10) <sup>*</sup>  | 0.37 |
|                                                           | PL   | 91  | value change | 0.78 (0.59, 1.08)  | 0.77 (0.56, 1.00)<br>-0.02 (-0.19, 0.15)             | 0.74 (0.60, 1.03)<br>-0.02 (-0.16, 0.15)             | 0.69 (0.54, 0.93)<br>-0.09 (-0.27, 0.02) <sup>†</sup>  |      |
| Serum calcium (mg/dL)                                     | VITD | 100 | value change | 9.4 (9.2, 9.6)     | 9.4 (9.2, 9.6)<br>-0.0 (-0.3, 0.2)                   | 9.4 (9.2, 9.6)<br>-0.0 (-0.3, 0.2)                   | 9.4 (9.2, 9.7)<br>0.0 (-0.2, 0.3)                      | 0.27 |
|                                                           | PL   | 91  | value change | 9.3 (9.1, 9.6)     | 9.4 (9.2, 9.6)<br>0.1 (-0.1, 0.3)                    | 9.5 (9.2, 9.7)<br>0.1 (-0.2, 0.3) <sup>*</sup>       | 9.4 (9.2, 9.7)<br>0.0 (-0.1, 0.3)                      |      |
| Serum phosphate (mmol/L)                                  | VITD | 100 | value change | 3.6 (3.3, 3.9)     | 3.5 (3.2, 3.7)<br>0.0 (-0.3, .03)                    | 3.5 (3.2, 3.8)<br>-0.1 (-0.4, 0.3)                   | 3.5 (3.2, 4.0)<br>-0.0 (-0.3, 0.4)                     | 0.48 |
|                                                           | PL   | 91  | value change | 3.5 (3.2, 3.9)     | 3.6 (3.2, 3.9)<br>0.0 (-0.3, 0.4)                    | 3.6 (3.3, 3.9)<br>0.0 (-0.3, 0.3)                    | 3.5 (3.2, 3.8)<br>-0.1 (-0.5, 0.3)                     |      |
| <b>Renal Related Variables</b>                            |      |     |              |                    |                                                      |                                                      |                                                        |      |
| Serum creatinine (mg/dL)                                  | VITD | 100 | value change | 0.89 (0.76, 0.99)  | 0.90 (0.79, 1.04)<br>0.03 (-0.03, 0.08) <sup>†</sup> | 0.92 (0.81, 1.01)<br>0.02 (-0.03, 0.08) <sup>†</sup> | 0.91 (0.80, 1.03)<br>0.03 (-0.02, 0.08) <sup>†</sup>   | 0.51 |
|                                                           | PL   | 91  | value change | 0.86 (0.76, 0.96)  | 0.88 (0.76, 1.01)<br>0.02 (-0.03, 0.07) <sup>*</sup> | 0.88 (0.76, 0.99)<br>0.02 (-0.04, 0.06)              | 0.89 (0.75, 1.00)<br>0.01 (-0.03, 0.07) <sup>*</sup>   |      |
| Estimated glomerular filtration rate (mL/min)             | VITD | 100 | value change | 125 (114, 140)     | 123 (109, 138)<br>0 (-12, 6.3)                       | 122 (107, 134)<br>0 (-15, 2.4) <sup>^</sup>          | 123 (109, 137)<br>-2 (-16, 3.7) <sup>*</sup>           | 0.43 |
|                                                           | PL   | 91  | value change | 126 (113, 142)     | 125 (110, 140)<br>0 (-7, 7)                          | 123 (117, 140)<br>0 (-10, 8)                         | 122 (108, 142)<br>0 (-11, 6)                           |      |
| Urine glucose (mg/dL)                                     | VITD | 100 | value change | 7.2 (5.1, 9.4)     | 7.4 (4.6, 10.0)<br>-0.4 (-3.3, 3.1)                  | 6.8 (4.9, 9.5)<br>-0.1 (-3.4, 3.1)                   | 6.9 (4.7, 8.7)<br>-0.4 (-3.3, 3.2)                     | 0.92 |
|                                                           | PL   | 91  | value change | 7.4 (5.5, 11.3)    | 7.5 (5.7, 10.1)<br>-0.2 (-3.6, 2.4)                  | 7.5 (4.5, 9.8)<br>-0.4 (-3.5, 2.5)                   | 7.4 (5.2, 10.0)<br>-0.4 (-3.2, 2.6)                    |      |
| Urine retinol binding protein to creatinine ratio (mcg/g) | VITD | 98  | value change | 101 (70, 142)      | 93 (71, 120)<br>-4 (-39, 26)                         | 95 (67, 134)<br>-6 (-41, 26)                         | 107 (67, 137)<br>-1 (-38, 33)                          | 0.40 |
|                                                           | PL   | 88  | value change | 104 (76, 163)      | 99 (67, 155)<br>0 (-26, 25)                          | 95 (60, 136)<br>-4 (-36, 23)                         | 90 (70, 156)<br>-5 (-34, 18)                           |      |

|                                           |      |    |              |                   |                                          |                                           |                                           |      |
|-------------------------------------------|------|----|--------------|-------------------|------------------------------------------|-------------------------------------------|-------------------------------------------|------|
| Urine beta-2 microglobulin (mcg/L)        | VITD | 98 | value change | 111 (53, 389)     | 137 (53, 368)<br>17 (-103, 128)          | 143 (74, 340)<br>8 (-96, 149)             | 139 (62, 418)<br>5 (-95, 112)             | 0.58 |
|                                           | PL   | 89 | value change | 134 (52, 306)     | 156 (65, 339)<br>-9 (-91, 104)           | 143 (63, 290)<br>8 (-129, 95)             | 163 (68, 312)<br>11 (-91, 157)            |      |
| Urine protein to creatinine ratio (mg/mg) | VITD | 98 | value change | 0.07 (0.05, 0.08) | 0.06 (0.05, 0.08)<br>-0.00 (-0.02, 0.01) | 0.06 (0.05, 0.08)<br>-0.00 (-0.02, 0.01)* | 0.06 (0.05, 0.07)<br>-0.00 (-0.02, 0.01)* | 0.16 |
|                                           | PL   | 90 | value change | 0.07 (0.05, 0.09) | 0.06 (0.05, 0.09)<br>-0.00 (-0.02, 0.01) | 0.06 (0.05, 0.08)<br>-0.01 (-0.02, 0.01)  | 0.07 (0.05, 0.08)<br>-0.00 (-0.01, 0.01)  |      |
| Tubular reabsorption of phosphate (%)     | VITD | 98 | value change | 91.7 (89.2, 93.8) | 91.2 (88.4, 93.8)<br>-0.7 (-3.5, 2.0)    | 90.0 (87.2, 93.5)<br>-0.6 (-4.4, 1.8)     | 90.1 (86.5, 93.8)<br>-1.6 (-4.7, 1.8)*    | 0.08 |
|                                           | PL   | 87 | value change | 91.5 (88.8, 94.2) | 91.8 (88.7, 94.7)<br>0.0 (-2.8, 3.4)     | 91.9 (87.8, 94.2)<br>-0.9 (-3.0, 2.3)     | 91.4 (88.1, 93.4)<br>0.6 (-2.9, 3.1)      |      |
| Urine calcium to creatinine ratio (mg/mg) | VITD | 98 | value change | 0.04 (0.02, 0.07) | 0.05 (0.02, 0.08)<br>0.00 (-0.02, 0.04)  | 0.05 (0.03, 0.10)<br>0.01 (-0.01, 0.05)*  | 0.05 (0.03, 0.09)<br>0.00 (-0.01, 0.03)   | 0.97 |
|                                           | PL   | 87 | value change | 0.04 (0.02, 0.07) | 0.05 (0.02, 0.09)<br>0.00 (-0.01, 0.04)* | 0.05 (0.03, 0.08)<br>0.01 (-0.01, 0.02)*  | 0.05 (0.02, 0.08)<br>0.01 (-0.01, 0.04)^  |      |

Abbreviations: PL, placebo randomized group; VITD, vitamin D3 randomized group.

Calculated variables: Serum free 1,25-OH(2)D was calculated from serum albumin, vitamin D binding protein (VDBP), and 1,25-OH(2)D[28]. Estimated glomerular filtration rate (eGFR) was calculated by the CKD-EPI equation[36] for participants age  $\geq 18$  years and by the bedside Schwartz formula[37] for those age  $< 18$  years. Urine calcium/creatinine (UCa/UCr; normal  $< 0.21$  mg/mg) ratio was used to estimate urinary calcium excretion. Tubular reabsorption of phosphate (TRP) was calculated as  $(1 - [(UPhos \times SCr)/(SPhos \times UCr)]) \times 100$ .

1. All data presented as median (Q1, Q3).
2. N = number with data available at both baseline and week 48.
3. P value: Wilcoxon rank sum test for change between baseline and week 48 for VITD3 versus placebo group
4. Value is the value of each variable at a given time point.
5. Change is the difference in the value between baseline and each time point. For BMD, change is presented as percent change. For all other variables, change is the absolute change.
6. \*  $0.01 < P \text{ value} < 0.05$ ; ^  $0.001 < P \text{ value} \leq 0.01$ ; †,  $P \leq 0.001$  for Wilcoxon signed rank test for difference from baseline to a given time point.
